# Supplementary material
Source: publisher site journal article supplement (https://www.dovepress.com/article/598139)
Supplement: Supplementary file 1 [file 598139%20Revised%20supplementary%20table%201.docx]

Supplementary Table 1 Primer Sequences

| Gene Symbol | Forward Sequence (5’-3’) | Reserve Sequence (5’-3’) |
| --- | --- | --- |
| Mouse 18S RNA | GGGAGCCTGAGAAACGGC | GGGTCGGGAGTGGGTAATTT |
| Mouse Il6 | TAGTCCTTCCTACCCCAATTTCC | TTGGTCCTTAGCCACTCCTTC |
| Mouse Tnfα | CCCTCACACTCAGATCATCTTCT | GCTACGACGTGGGCTACAG |
| Mouse Mcp1 | TTAAAAACCTGGATCGGAACCAA | GCATTAGCTTCAGATTTACGGGT |
| Mouse Brd4 | GTGAGAAGCTAGGCCGTGTAG | AGGCAGGACCTGTTTCAGAGT |
| Mouse Stat1 | TCACAGTGGTTCGAGCTTCAG | GCAAACGAGACATCATAGGCA |
| Mouse Cd86 | TGTTTCCGTGGAGACGCAAG | TTGAGCCTTTGTAAATGGGCA |
| Mouse iNos | GTTCTCAGCCCAACAATACAAGA | GTGGACGGGTCGATGTCAC |
